# Supplementary material for: Features for medically serious suicide attempters who do not have a strong intent to die: a cross-sectional study in rural China
Source: PubMed Central journal article supplement (PMC6144317; doi:10.1136/bmjopen-2018-023991), 2018-09-11
Supplement: bmjopen-2018-023991.draft_revisions.pdf [file bmjopen-2018-023991.draft_revisions.pdf]

# BMJ Open

BMJ Open is committed to open peer review. As part of this commitment we make the peer review history of every article we publish publicly available.

When an article is published we post the peer reviewers' comments and the authors' responses online. We also post the versions of the paper that were used during peer review. These are the versions that the peer review comments apply to.

The versions of the paper that follow are the versions that were submitted during the peer review process. They are not the versions of record or the final published versions. They should not be cited or distributed as the published version of this manuscript.

BMJ Open is an open access journal and the full, final, typeset and author-corrected version of record of the manuscript is available on our site with no access controls, subscription charges or pay-per-view fees (<http://bmjopen.bmj.com>).

If you have any questions on BMJ Open's open peer review process please email [info.bmjopen@bmj.com](mailto:info.bmjopen@bmj.com)

# BMJ Open

## Features for Medically Serious Suicide Attempters Who Do Not Have a Strong Intent to Die in rural China

|                               |                                                                                            |
|-------------------------------|--------------------------------------------------------------------------------------------|
| Journal:                      | <i>BMJ Open</i>                                                                            |
| Manuscript ID                 | bmjopen-2018-023991                                                                        |
| Article Type:                 | Research                                                                                   |
| Date Submitted by the Author: | 05-May-2018                                                                                |
| Complete List of Authors:     | Sun, Long; Shandong University, School of public health<br>Zhang, Jie; Buffalo State, SUNY |
| Keywords:                     | Suicide intent, Medically serious suicide, Suicide attempters, Rural China                 |
|                               |                                                                                            |

SCHOLARONE™  
Manuscripts

view only

1  
2  
3  
4 **Features for Medically Serious Suicide Attempters Who Do Not Have**  
5  
6 **a Strong Intent to Die in rural China<sup>1</sup>**  
7  
8  
9  
10  
11  
12

13 Long Sun <sup>a</sup>, Jie Zhang <sup>a, b, \*</sup>  
14  
15  
16  
17  
18

19 a: Center for Suicide Prevention and Research, School of Public Health, Shandong  
20 University, 44 Wenhuxi Road, Jinan, Shandong 250012, China. Email:  
21 sunlong@sdu.edu.cn  
22  
23

24 b: State University of New York Buffalo State, Buffalo, New York, USA;  
25

26 \*: Corresponding author. Department of Sociology, State University of New York  
27 Buffalo State, 1300 Elmwood Avenue, Buffalo, New York 14222, USA. Phone:  
28 716-878-6425; FAX: 716-878-4009; Email: zhangj@buffalostate.edu.  
29  
30  
31  
32  
33  
34  
35  
36  
37  
38  
39  
40  
41  
42  
43  
44  
45  
46  
47  
48  
49  
50  
51  
52

53  
54 <sup>1</sup> The research was supported by the United States National Institute of Mental Health  
55 (R01 MH068560) and National Natural Science Foundation of China (71603149).  
56

# Features for Medically Serious Suicide Attempters Who Do Not Have a Strong Intent to Die in rural China

## Abstract

### Objective

This study aims to analyze the features for medically serious suicide attempters who do not have a strong intent to die in rural china.

**Design** Cross-sectional study

**Setting** Rural China.

### Participants

Subjects were 791 medically serious suicide attempters who were limited only to those survivals whose injury and wounds were so serious as to require hospitalization or immediate medical care.

### Results

The results supported that less education years, religious belief, living alone, negative life events, low level of impulsivity, mental disorder were associated with higher level of suicide intent.

### Conclusion

These imply that there are some medically serious suicide attempters with higher education and impulsivity who are not really want to die by suicide. It can be translated into practice in Chinese suicide prevention.

**Keywords:** Suicide intent; medically serious suicide; suicide attempters; rural China.

### Strengths and limitations of this study

1. This is a study based on a large sample of attempted suicides in rural China (n=791);
2. Medically serious suicide attempters were consecutively recruited in selected emergency rooms, which ensure the validity of the sample.
3. It is one of few reports about the factors associated with suicide intent among suicide attempt in rural China.
4. As this is a cross-sectional study, we cannot infer any causal relationship for all of the factors analyzed in this study.
5. All of the attempters were interviewed after they had leaved hospitals, and recall basis cannot be avoided.

# Features for Medically Serious Suicide Attempters Who Do Not Have a Strong Intent to Die in rural China

## Background

World Health Organization (WHO) estimated that there were about 804 000 suicide death worldwide in 2012, which meant there was one person died by suicide every 40 seconds<sup>1</sup>. For suicide attempt, some studies assessed that the number was about 20 times higher than suicide death, and nearly 50% of them required emergency medical treatment<sup>2,3</sup>. China was one of few countries which reported higher suicide rate in the world<sup>4</sup>. Although the Chinese suicide rates have decreased in recent years, completed suicide and attempt suicide are also important social and public health issues in China<sup>5</sup>.

In the last decades, lots of studies have explored the patterns of suicide, and we found several differences in suicides between China and Western countries<sup>6</sup>. In these findings, many of them imply that there are some suicides who do not intent to die by suicide, and they may only instrumentally use for certain gains.

Firstly, the percentage of mental disorder among suicide is different. In Western countries, there are about 90% of suicides who can be diagnosed with mental disorder<sup>7</sup>. However, the percentage in China is only about 40- 70%<sup>8</sup>. Although mental disorder is also an important risk factor for suicide behavior, other factors may also play roles in the Chinese suicide which need to be discussed.

Secondly, impulsivity is another factor which has been identified as a risk factor for suicide attempt both in China and Western countries<sup>9,10</sup>. However, previous study

1  
2  
3  
4 found that there were about 50% of suicide attempters can be categorized as  
5  
6 impulsivity suicide in China <sup>11</sup>. It further implies us there are a large group of Chinese  
7  
8 suicide attempters who do not really want to die by suicide, and their suicide behavior  
9  
10 was promoted by impulsivity.  
11

12  
13 As we mentioned above, many findings about Chinese suicide speculate that  
14  
15 there are some suicides who do not really want to die by suicide. Suicide intent is  
16  
17 defined as the level of intent to die by suicide <sup>12</sup>, and many studies show that it is  
18  
19 significantly associated with suicide behavior <sup>13</sup>. Analyzing suicide intent is helpful  
20  
21 for us to better understanding the suicides who do not really want to die.  
22  
23

24  
25 In recent years, many studies had identified some factors which were associated  
26  
27 with suicide intent. In Western countries, previous studies found that older adults <sup>14</sup>,  
28  
29 rural resident <sup>15</sup>, mental health problem <sup>16</sup> and hopelessness <sup>17</sup> were associated with  
30  
31 suicide intent. In China, there were also some studies which supported that older age,  
32  
33 higher level of education, living alone and suicide communication were correlated  
34  
35 with higher level of suicide intent among completed suicide <sup>18 19</sup>. However, we have  
36  
37 little knowledge about the suicide intent among suicide attempters who do not really  
38  
39 want to die by suicide in China.  
40  
41

42  
43 This study aims to analyze the suicide intent among medically serious suicide  
44  
45 attempters in rural China. It is helpful for us to realize what kinds of suicide  
46  
47 attempters do not really want to die by suicide. It is also useful for us to better know  
48  
49 the suicide behavior, and make some direct evidence for suicide prevention and  
50  
51 intervention in China.  
52  
53

## Methods

### *Study sample and the design*

In the current study, all of attempters were chose from two provinces in China, Shandong and Hunan. Shandong locates in the north of China, and it is a province with economic prosperity in both industry and agriculture. Hunan locates in the south of China, and it is a province with economic prosperity in agriculture. In the two provinces, thirteen rural counties were randomly selected from them.

In each of the rural county, departments of hospital emergency were connected to notify the research teams in each province the suicide attempters on monthly basis from May 2012 through July 2013. We consecutively recruited the attempters who aged 15-54 years in rural region. In this study, medically serious suicide attempters were limited only to those survivals whose injury and wounds were so serious as to require hospitalization or immediate medical care.

All of the interviewers would receive a strict training about this study before the interview. The main aims for this training were to make the interviewers sufficiently understanding about this study and each question in the questionnaire.

### *Interviewing procedures*

All the attempters were interviewed when they had leaved hospitals because of their weakness in the hospitals. To connect with the attempters, all of them were first approached by the local health agency or the village administration by a personal visit. Upon their agreement on the written informed consent, the interview time was

1  
2  
3  
4 scheduled about two months after suicide incident. Each attempter was interviewed  
5  
6 separately by one trained interviewer in a private place of a village medical room or  
7  
8 their home. For those participants who were too weak to talk, family members could  
9  
10 assist in the interview by answering some of the questions on the protocol. The  
11  
12 average time for each interview was 1.5 hours.  
13  
14

### 15 ***Patient and Public Involvement statement***

16  
17  
18 The IRB approvals from both the Chinese institutions (Shandong University and  
19  
20 Central North university) and the US based university (State University of New York,  
21  
22 Buffalo State) where the principal investigator is affiliated ensured the human  
23  
24 subjects protection and the ethical methodology regulated by the NIMH which funded  
25  
26 the project. Written Informed consent was obtained from all participants of the study.  
27  
28  
29

### 30 ***Measures***

31  
32  
33  
34 ***Suicide Intent*** Beck's Suicidal Intent Scale (SIS) was used to measure the  
35  
36 degree of suicide intent for the attempters<sup>20</sup>. It mainly evaluates the attempters'  
37  
38 precautions, planning, communication and expectations about the suicide behavior.  
39  
40 There are 15 items in this scale, and each item is weighted on 0-2. The English  
41  
42 version of SIS had been evaluated by Beck and David among completed suicides and  
43  
44 attempted suicides<sup>21</sup>. The Chinese version of SIS also has sound reliability and  
45  
46 validity which has been testified in a previous study<sup>22</sup>.  
47  
48  
49

50 ***Social-demographic variables*** **Age** which ranged from 15 to 54 years was  
51  
52 calculated to the time when the suicide occurred. **Gender** was measured by male or  
53  
54 female. **Education years** were evaluated by the years which the attempters learned in  
55  
56

1  
2  
3  
4 school. **Married status** was dichotomized as “never married” and “ever married”  
5  
6 with the latter including those who were divorced, separated, or widowed.  
7

8 **Occupation** was measured by peasant, businessman, public service staff, student,  
9  
10 factory worker, rural doctor, teacher, housewife, unemployed and others. As most  
11  
12 attempters were peasants, we recoded it into peasants and others. **Religious belief** was  
13  
14 measured by what religion the attempters believed in, and the choices were Taoism,  
15  
16 Muslim, Christianity, Buddhism, others, and no religion. As there were few people  
17  
18 have a religious belief, the religious belief was recoded into “yes” or “no.”  
19  
20  
21

22 **Living alone** Living alone was estimated by a question that “Do you live with  
23  
24 others?” The answer can be chose from yes or no. Somebody who did not live with  
25  
26 others was seen as living alone. The same evaluation method was also used in our  
27  
28 previous suicide studies <sup>23</sup>.  
29  
30

31 **Physical Disease** Physical disease was estimated by one question that “Do  
32  
33 you diagnose with a chronic disease now?” The answer could be chosen from “yes” or  
34  
35 “no.”  
36  
37  
38

39 **Pesticide at home** Pesticide availability at home was assessed with a single  
40  
41 item which asked the participants if any type of farming chemicals was stored at home.  
42  
43 The answer also could be chosen from “yes” or “no.”  
44  
45

46 **Family suicide history** Family suicide history was measured by a question  
47  
48 that “Do your family members conduct suicide behavior before?” The answer also  
49  
50 could be chosen from “yes” or “no.”  
51  
52  
53  
54  
55

1  
2  
3  
4           **Negative life events**    Negative life events were calculated by the revised  
5  
6 version of Interview for Recent Life Events (IRLE)<sup>24</sup>. The IRLE is a 64-item scale  
7  
8 which measures the life events happened in the past 12 months. We also asked  
9  
10 another question that if there were other life events which were not mentioned in the  
11  
12 64 items. The attempters should also answer that if each event was perceived as  
13  
14 positive or negative. In this study, we only used the number of negative life events  
15  
16 (NLEs). The Chinese version of IRLE have been used in many previous suicide  
17  
18 studies<sup>25</sup>.

19  
20  
21  
22           **Impulsivity**    Dickman Impulsivity Inventory (DII) was used to evaluate the  
23  
24 level of impulsivity. It is a 23-item scale developed and validated in English by  
25  
26 Dickman<sup>26</sup>. Each item is weight by yes (1) or no (0). The sum score for all items was  
27  
28 used in the data analysis, and the higher score means higher level of impulsivity. The  
29  
30 Chinese version of DII had be tested with sound reliability and validity<sup>27</sup>.

31  
32  
33  
34           **Coping skill**    Coping Responses Inventory (CRI) was used to assess the  
35  
36 attempters' coping skill in this study<sup>28</sup>. It asked the participants to evaluate the  
37  
38 frequency (0= never, 1=occasionally, 2=sometimes, 3=often) of engaging in 48  
39  
40 separate coping activities. The sample questions in CRI were “talk with your spouse  
41  
42 or other relative about the problem” and “think about how this event could change  
43  
44 your life in a positive way.” The Chinese version of CRI had been used in previous  
45  
46 suicide studies<sup>29</sup>.

47  
48  
49  
50           **Mental disorder**    We used the Chinese version of the Structured Clinical  
51  
52 Interview for the Diagnostic and Statistical Manual of Mental Disorders (SCID)<sup>30</sup> to  
53  
54 generate diagnoses for attempters. Diagnoses were made by the psychiatrists with the

1  
2  
3  
4 written information obtained by the trained interviewers for each suicide attempt. The  
5  
6 Chinese version of the SCID was provided by the Department of Psychiatry of  
7  
8 Kaohsiung Medical College in Taiwan <sup>31</sup>, and permission to use the work had been  
9  
10 obtained. It also had been used in Chinese populations in many areas including  
11  
12 Taiwan, Hong Kong, Macau, as well as mainland China for the past few decades <sup>32</sup>. A  
13  
14 total of 27 Axis I mental diseases were detected by the SCID, and we used the  
15  
16 dichotomous diagnosis for each of them with yes and no.  
17  
18

### 19 20 ***Statistical Methods***

21  
22  
23 IBM SPSS Statistics 24.0 (Web Edition) was used for the data analysis. T-tests  
24  
25 or bi-variable correlation analysis were used to compare the differences in suicide  
26  
27 intent among categorical and continuous variables. Stepwise liner regression was  
28  
29 performed to examine the factors related to suicide intent. All of the tests were  
30  
31 two-tailed and a p value of <0.05 was considered statistically significant.  
32  
33

### 34 35 **Results**

36  
37  
38 In Table 1, we described the sample distribution about the social and  
39  
40 psychological characteristics among Chinese rural medically serious suicide  
41  
42 attempters. The average age and education years were 31.63 and 6.90 years,  
43  
44 respectively. In these attempters, there were more females (63.0%) and peasants  
45  
46 (53.4%). More attempters were ever married (83.3%), not believing in religion  
47  
48 (81.3%), not suffering physical disease (83.2%), storing pesticide at home (60.4%),  
49  
50 not living alone (95.6%), not having family suicide history (92.9%) and not diagnosed  
51  
52  
53  
54  
55

1  
2  
3  
4 with mental disorder (80.9%). The mean for negative life events, impulsivity and  
5  
6 coping skill were 1.83, 9.89 and 33.13, respectively.  
7

8  
9 We also analyzed the differences of suicide intent among these social and  
10  
11 psychological characteristic. The results showed that age ( $r=0.071$ ,  $p=0.045$ ),  
12  
13 education years ( $r=-0.076$ ,  $p=0.032$ ), religious belief ( $t=3.340$ ,  $p=0.001$ ), living alone  
14  
15 ( $t=2.315$ ,  $p=0.021$ ), physical disease ( $t=2.416$ ,  $p=0.016$ ), negative life events ( $r=0.148$ ,  
16  
17  $p=0.000$ ), impulsivity ( $r=-0.084$ ,  $p=0.019$ ), mental disorder ( $t=7.393$ ,  $p=0.000$ ) were  
18  
19 associated with suicide intent. The detailed information was shown in Table 2.  
20  
21

22  
23 Table 3 listed the results of stepwise liner regression about the factors associated  
24  
25 with suicide intent. We found that less education years ( $\beta = -0.11$ ,  $p=0.037$ ), religious  
26  
27 belief ( $\beta = 1.20$ ,  $p=0.005$ ), living alone ( $\beta = 1.92$ ,  $p=0.017$ ), negative life events ( $\beta$   
28  
29  $= -0.29$ ,  $p=0.003$ ), low level of impulsivity ( $\beta = -0.10$ ,  $p=0.013$ ), mental disorder ( $\beta$   
30  
31  $= 2.82$ ,  $p=0.000$ ) were associated with higher level of suicide intent.  
32  
33

### 34 35 Discussion

36  
37  
38 This is a study focusing on suicide intent among medically serious suicide  
39  
40 attempters in rural China. The primary purpose is to explore the features for medically  
41  
42 serious suicide attempters who do not have a strong intent to die. The results showed  
43  
44 that the attempters with strong intent to die were associated with religious belief,  
45  
46 living alone, negative life events and mental disorder, and the low intent suicide  
47  
48 attempters were related to education years and impulsivity.  
49  
50

51  
52 In the current study, we found that education years were negatively associated  
53  
54 with suicide intent. It means that the attempters with higher education have lower  
55

1  
2  
3  
4 intention to die by suicide behavior. Many studies also have identified that higher  
5 education was a protective factor for suicide behavior worldwide<sup>33 34</sup>. In China,  
6  
7 previous studies also support this relationship between education and suicide intent  
8  
9 among rural suicides<sup>35</sup>.

10  
11  
12  
13 Religious belief is another factor associated with strong suicide intent. As there  
14 are few people who have a religious belief in China<sup>36</sup>, many people see religious  
15 belief as a deviant behavior. Suicide which also can be seen as a deviant behavior in  
16 the society may be correlated between them. Besides, many Chinese rural residents  
17 believe in a religion after they suffer difficulties or misfortunes. Suffering difficulties  
18 or misfortunes, as an important risk factor for suicide<sup>37</sup>, may promote the intent to die  
19 by suicide in rural China. This is why attempters with religious belief have strong  
20 intent to die by suicide. It is different from the findings in Western countries<sup>38</sup>.

21  
22  
23  
24 We also found living alone and negative life events promoted the suicide intent  
25 among attempters. Both of them have been proved to be risk factors for suicide  
26 behavior in previous studies worldwide<sup>39 40</sup>. People who do not live with others are  
27 hard to receive social support, and this can raise the risk of suicide. Somebody  
28 encounter negative life events can lead to psychological problems, and it is also a very  
29 important risk factor for suicide behavior. In the same way, people who live alone and  
30 suffer negative life events would have strong intent to die by suicide.

31  
32  
33  
34 Impulsivity has been identified as an important risk factor for suicide in many  
35 studies<sup>41 42</sup>. As we introduced above, many Chinese suicide attempters can be  
36 diagnosed with impulsivity suicide<sup>11</sup>. Previous study also supported that impulsivity  
37 was associated with completed suicide in rural China<sup>19</sup>. It implies that some

1  
2  
3  
4 attempters do not want to die by suicide, and this is also consistent with our  
5  
6 assumption in the Introduction section.  
7

8  
9 The present study also identified that mental disorder was associated with suicide  
10  
11 intent. Similar to other previous studies, mental disorder was a very important risk  
12  
13 factor for suicide behavior<sup>43 44</sup>. Somebody diagnosed with mental disorder are  
14  
15 tortured by the psychological problem. Suicide may be a way for them to avoid this  
16  
17 problem. Thus, attempters with mental disorder really want to die by suicide.  
18  
19

20  
21 In the current study, we also analyzed the relationship between physical disease,  
22  
23 family suicide history and suicide intent. Both of them are not associated with suicide  
24  
25 intent in our results. For physical disease, it is associated with suicide behavior which  
26  
27 was supported by previous studies<sup>45</sup>. However, somebody suffered physical disease  
28  
29 do not have a stronger intent to die than others without physical disease. It may be  
30  
31 caused by the psychological problems. In this regression, we have controlled mental  
32  
33 disorder. Previous studies have found that physical disease may lead to mental  
34  
35 problem which is a risk factor for suicide behavior<sup>46</sup>. Although some studies found  
36  
37 family suicide history was associated with suicide behavior<sup>47</sup>, we have no direct  
38  
39 evidence to prove it is associated with suicide intent.  
40  
41  
42

43  
44 There are also several limitations which we should be considered when we  
45  
46 interpret these findings. Firstly, as this is a cross-sectional study, we cannot infer any  
47  
48 causal relationship for all of the factors analyzed in this study. Secondly, all of the  
49  
50 attempters were interviewed after they had leaved hospitals, and recall bias cannot be  
51  
52 avoided. Thirdly, the participants in this study were all medically serious suicide  
53  
54 attempters. Thus, the results may be not consistent with other suicide attempters.  
55

## Conclusion

Although there are these limitations, this study also contributes to our understanding about the Chinese suicide behavior. Our results support that there are some medically serious suicide attempters with higher education and impulsivity who are not really want to die by suicide. It can be translated into practice in Chinese suicide prevention.

### *Contributorship statement*

LS analyzed the data and wrote the manuscript, JZ designed the study and reviewed the paper.

### *Competing interests*

Both of the authors declare that they have no Competing interests.

### *Funding*

The research was supported by the United States National Institute of Mental Health (R01 MH068560) and National Natural Science Foundation of China (71603149).

### *Data sharing statement*

The data and materials used in this study are available from the first author (LS) and corresponding author (JZ) on reasonable request.

### *Acknowledgements*

1  
2  
3  
4  
5  
6  
7  
8  
9  
10  
11  
12  
13  
14  
15  
16  
17  
18  
19  
20  
21  
22  
23  
24  
25  
26  
27  
28  
29  
30  
31  
32  
33  
34  
35  
36  
37  
38  
39  
40  
41  
42  
43  
44  
45  
46  
47  
48  
49  
50  
51  
52  
53  
54  
55  
56  
57  
58  
59  
60

We would like to thank the participants in this study, and we also want to appreciate the research teams in China for their field work in the data collection.

For peer review only

## References:

1. WHO. Preventing Suicide: A Global Imperative. World Health Organization, Geneva 2014.
2. Maris RW, Berman AL, Silverman MM. Comprehensive Textbook of Suicidology. New York: The Guilford Press 2000.
3. Crosby AE, Han B, Ortega LAG, et al. Suicide thoughts and behaviors among adults aged  $\geq 18$  years -- United States, 2008-2009. *Morbidity and Mortality Weekly Report Surveillance Summaries* 2011;60(13):1-22. [published Online First: October 21, 2011]
4. Phillips MR, Li X, Zhang Y. Suicide rates in China, 1995-99. *The Lancet* 2002;359(9359):835-40. doi: 10.1016/S0140-6736(02)07954-0
5. Zhang J, Sun L, Liu Y, et al. The change in suicide rates between 2002 and 2011 in China. *Suicide Life Threat Behav* 2014;44(5):560-68. doi: 10.1111/sltb.12090 [published Online First: 2014/04/03]
6. Qin P, Mortensen PB. Specific characteristics of suicide in China. *Acta Psychiatr Scand* 2001;103(2):117-21.
7. Cavanagh JT, Carson AJ, Sharpe M, et al. Psychological autopsy studies of suicide: a systematic review. *Psychol Med* 2003;33(3):395-405.
8. Zhang J, Xiao S, Zhou L. Mental disorders and suicide among young rural Chinese: a case-control psychological autopsy study. *Am J Psychiatry* 2010;167(7):773-81. doi: 10.1176/appi.ajp.2010.09101476 [published Online First: 2010/04/17]
9. Zhang J, Lin L. The Moderating Effects of Impulsivity on Chinese Rural Young Suicide. *Journal of clinical psychology* 2014;70(6):579-88. doi: 10.1002/jclp.22039
10. Baca-Garcia E, Diaz-Sastre C, Garcia Resa E, et al. Suicide attempts and impulsivity. *Eur Arch Psychiatry Clin Neurosci* 2005;255(2):152-56. doi: 10.1007/s00406-004-0549-3
11. Li X, Phillips M, Wang Y, et al. The comparison of impulsive and non-impulsive attempted suicide. *Chinese Journal of Nervous and Mental Diseases* 2003;29(1):27-31.
12. Freedenthal S. Assessing the wish to die: a 30-year review of the suicide intent scale. *Arch Suicide Res* 2008;12(4):277-98. doi: 10.1080/13811110802324698
13. Scocco P, Marietta P, Tonietto M, et al. The role of psychopathology and suicidal intention in predicting suicide risk: a longitudinal study. *Psychopathology* 2000;33(3):143-50. doi: 29136 [published Online First: 2000/04/25]
14. Miret M, Nuevo R, Morant C, et al. Differences between younger and older adults in the structure of suicidal intent and its correlates. *Am J Geriatr Psychiatry* 2010;18(9):839-47. doi: 10.1097/JGP.0b013e3181d145b0
15. Krishna M, Rajendra R, Majgi SM, et al. Severity of suicidal intent, method and behaviour antecedent to an act of self-harm: a cross sectional study of survivors of self-harm referred to a tertiary hospital in Mysore, south India. *Asian J Psychiatr* 2014;12:134-9. doi: 10.1016/j.ajp.2014.09.002
16. Mars B, Heron J, Crane C, et al. Differences in risk factors for self-harm with and without suicidal intent: findings from the ALSPAC cohort. *J Affect Disord* 2014;168:407-14. doi: 10.1016/j.jad.2014.07.009
17. Cheung YB, Law CK, Chan B, et al. Suicidal ideation and suicidal attempts in a population-based study of Chinese people: risk attributable to hopelessness, depression,

- and social factors. *J Affect Disord* 2006;90(2-3):193-99. doi: 10.1016/j.jad.2005.11.018 [published Online First: 2006/01/13]
18. Zhou X, Jia S. Suicidal communication signifies suicidal intent in Chinese completed suicides. *Soc Psychiatry Psychiatr Epidemiol* 2012;47(11):1845-54. doi: 10.1007/s00127-012-0488-7
19. Sun L, Zhang J. Characteristics of Chinese rural young suicides: Who did not have a strong intent to die. *Compr Psychiatry* 2015;57(1):73-78. doi: 10.1016/j.comppsy.2014.11.019
20. Beck AT, Schuyler D, Herman I. Development of Suicidal Intent Scales. Oxford, England: Charles Press Publishers 1974:249.
21. Beck AT, Lester D. Components of suicidal intent in completed and attempted suicides. *J Psychol* 1976;92(1):35-38.
22. Zhang J, Jia CX. Suicidal intent among young suicides in rural China. *Arch Suicide Res* 2011;15(2):127-39. doi: 10.1080/13811118.2011.565269
23. Zhang J, Sun L. Suicide ideation and acceptability among females aged 15 to 34 years in rural China. *J Nerv Ment Dis* 2014;202(2):161-66.
24. Paykel ES, Prusoff BA, Uhlenhuth EH. Scaling of life events. *Archives of general psychiatry* 1971;25(4):340-47. doi: 10.1001/archpsyc.1971.01750160052010 [published Online First: 1971/10/01]
25. Sun L, Zhang J. Coping Skill as a Moderator Between Negative Life Events and Suicide Among Young People in Rural China. *Journal of clinical psychology* 2015;71(3):258-66. doi: 10.1002/jclp.22140
26. Dickman SJ. Functional and dysfunctional impulsivity: personality and cognitive correlates. *J Pers Soc Psychol* 1990;58(1):95-102. doi: 10.1037/0022-3514.58.1.95
27. Gao Q, Zhang J, Jia C. Psychometric properties of the Dickman Impulsivity Instrument in suicide victims and living controls of rural China. *J Affect Disord* 2011;132(2011):368-74. doi: 10.1016/j.jad.2011.03.002
28. Moos RH, Brennan PL, Fondacaro MR, et al. Approach and avoidance coping responses among older problem and nonproblem drinkers. *Psychol Aging* 1990;5(1):31-40. [published Online First: 1990/03/01]
29. Sun L, Zhang J. Psychological Strains and Suicidal Intent An Empirical Study to Relate the 2 Psychopathological Variables. *J Nerv Ment Dis* 2016;204(11):855-60. doi: 10.1097/Nmd.0000000000000529
30. Spitzer RL, Williams JBW, Gibbon M, et al. Instruction Manual for the Structured Clinical Interview for DSM-III-R (SCID, 6/1/88 Revision). New York: Biometrics Research Department, New York State Psychiatric Institute 1988.
31. Gu J, Chen Y. Instruction Manual for the Structured Clinical Interview for DSM-III-R (Chinese Edition). Kaohsiung: Kaohsiung Medical College, Taiwan 1993.
32. Lyu J, Zhang J. Characteristics of schizophrenia suicides compared with suicides by other diagnosed psychiatric disorders and those without a psychiatric disorder. *Schizophr Res* 2014;155(2014):59-65. doi: 10.1016/j.schres.2014.02.018 [published Online First: 2014/03/25]

- 1  
2  
3  
4 33. Li Y, Li Y, Cao J. Factors associated with suicidal behaviors in mainland China: a  
5 meta-analysis. *BMC public health* 2012;12(1):524-30. doi: 10.1186/1471-2458-12-524  
6  
7 34. Beautrais AL. Risk factors for suicide and attempted suicide among young people. *Aust N*  
8 *Z J Psychiatry* 2000;34(3):420-36. doi: 0.1080/j.1440-1614.2000.00691.x  
9  
10 35. Liu B, Wang X, Jia C. Suicide attempters with high and low suicide intent: Different  
11 populations in rural China. *Psychiatry Res* 2017;251:176-81. doi:  
12 10.1016/j.psychres.2017.01.096  
13  
14 36. Yang FG. The red, black, and gray markets of religion in China. *Sociol Quart*  
15 2006;47(1):93-122. doi: DOI 10.1111/j.1533-8525.2006.00039.x  
16  
17 37. Jaiswal SV, Faye AD, Gore SP, et al. Stressful life events, hopelessness, and suicidal intent  
18 in patients admitted with attempted suicide in a tertiary care general hospital. *J*  
19 *Postgrad Med* 2016;62(2):102-4. doi: 10.4103/0022-3859.180556  
20  
21 38. Stack S, Kposowa AJ. Religion and suicide acceptability: a cross-national analysis. *J Sci*  
22 *Study Relig* 2011;50(2):289-306.  
23  
24 39. Bao WN, Haas A, Pi Y. Life strain, negative emotions, and delinquency: An empirical test  
25 of general strain theory in the People's Republic of China. *Int J Offender Ther Comp*  
26 *Criminol* 2004;48(3):281-97.  
27  
28 40. Kinyanda E, Hjelmeland H, Musisi S. Negative life events associated with deliberate  
29 self-harm in an African population in Uganda. *Crisis* 2005;26(1):4-11. doi:  
30 10.1027/0227-5910.26.1.4 [published Online First: 2005/03/15]  
31  
32 41. Braquehais MD, Oquendo MA, Baca-Garcia E, et al. Is impulsivity a link between  
33 childhood abuse and suicide? *Compr Psychiatry* 2010;51(2):121-29. doi:  
34 10.1016/j.comppsy.2009.05.003  
35  
36 42. Swann AC, Dougherty DM, Pazzaglia PJ, et al. Increased Impulsivity Associated With  
37 Severity of Suicide Attempt History in Patients With Bipolar Disorder. *Am J Psychiatry*  
38 2005;162(9):1680-87. doi: 10.1176/appi.ajp.162.9.1680  
39  
40 43. Bi B, Tong J, Liu L, et al. Comparison of patients with and without mental disorders  
41 treated for suicide attempts in the emergency departments of four general hospitals in  
42 Shenyang, China. *Gen Hosp Psychiatry* 2010;32(5):549-55. doi:  
43 10.1016/j.genhosppsy.2010.06.003  
44  
45 44. Beautrais AL, Deavoll BJ, Fergusson DM, et al. Prevalence and comorbidity of mental  
46 disorders in persons making serious suicide attempts: a case-control study. *Am J*  
47 *Psychiatry* 1996;153(8):1009-14.  
48  
49 45. Timonen M, Viilo K, Vaisanen E, et al. Burden of illness and suicide in elderly people.  
50 Physical disease and depression are prevalent in elderly Finnish suicide victims. *Bmj*  
51 2002;325(7361):441.  
52  
53 46. Ge D, Sun L, Zhou C, et al. Exploring the risk factors of suicidal ideation among the  
54 seniors in Shandong, China: A path analysis. *J Affect Disord* 2017;207:393-97. doi:  
55 10.1016/j.jad.2016.09.031  
56  
57 47. Bridge JA, Reynolds B, McBee-Strayer SM, et al. Impulsive aggression, delay discounting,  
58 and adolescent suicide attempts: effects of current psychotropic medication use and  
59 family history of suicidal behavior. *J Child Adolesc Psychopharmacol* 2015;25(2):114-23.  
60 doi: 10.1089/cap.2014.0042

Table 1: Description of the social and psychological characteristics among Chinese rural medically serious suicide attempters (n=791)

| Variables              |               | Mean±SD/n (%) |
|------------------------|---------------|---------------|
| Age                    | -             | 31.63±8.00    |
| Gender                 | Male          | 293 (37.0)    |
|                        | Female        | 498 (63.0)    |
| Education years        | -             | 6.90±3.26     |
| Married status         | Never married | 132 (16.7)    |
|                        | Ever Married  | 659 (83.3)    |
| Occupation             | Peasant       | 422 (53.4)    |
|                        | Others        | 369 (46.6)    |
| Religious belief       | Yes           | 148 (18.7)    |
|                        | No            | 643 (81.3)    |
| Living alone           | Yes           | 35 (4.4)      |
|                        | No            | 756 (95.6)    |
| Physical disease       | Yes           | 133 (16.8)    |
|                        | No            | 658 (83.2)    |
| Pesticide at home      | Yes           | 478 (60.4)    |
|                        | No            | 313 (39.6)    |
| Family suicide history | Yes           | 56 (7.1)      |
|                        | No            | 735 (92.9)    |
| Negative life events   | -             | 1.83±1.77     |
| Impulsivity            | -             | 9.89±4.08     |
| Coping skill           | -             | 33.13±10.16   |
| Mental disorder        | Yes           | 151 (19.1)    |
|                        | No            | 640 (80.9)    |

Table 2: Comparing the suicide intent among the social and psychological characteristics (n=791)

| Variables              | Suicide intent (Mean±SD) | t/r    | p     |
|------------------------|--------------------------|--------|-------|
| Age                    | -                        | 0.071  | 0.045 |
| Gender                 |                          | 0.342  | 0.559 |
| Male                   | 9.37±4.96                |        |       |
| Female                 | 9.86±4.84                |        |       |
| Education years        | -                        | -0.076 | 0.032 |
| Married status         |                          | 1.179  | 0.239 |
| Never married          | 9.22±4.88                |        |       |
| Ever married           | 9.77±4.89                |        |       |
| Occupation             |                          | 1.811  | 0.071 |
| Peasant                | 9.97±4.92                |        |       |
| Others                 | 9.34±4.84                |        |       |
| Religious belief       |                          | 3.430  | 0.001 |
| Yes                    | 10.91±4.82               |        |       |
| No                     | 9.39±4.87                |        |       |
| Living alone           |                          | 2.315  | 0.021 |
| Yes                    | 11.54±5.52               |        |       |
| No                     | 9.59±4.85                |        |       |
| Physical disease       |                          | 2.416  | 0.016 |
| Yes                    | 10.61±4.93               |        |       |
| No                     | 9.49±4.86                |        |       |
| Pesticide at home      |                          | -0.980 | 0.327 |
| Yes                    | 9.54±4.66                |        |       |
| No                     | 9.89±5.23                |        |       |
| Family suicide history |                          | 2.104  | 0.036 |
| Yes                    | 11.00±5.18               |        |       |
| No                     | 9.58±4.86                |        |       |
| Negative life events   | -                        | 0.148  | 0.000 |
| Impulsivity            | -                        | -0.084 | 0.019 |
| Coping skill           | -                        | -0.067 | 0.061 |
| Mental disorder        |                          | 7.393  | 0.000 |
| Yes                    | 12.24±4.77               |        |       |
| No                     | 9.07±4.72                |        |       |
| All                    | 9.68±4.89                | -      | -     |

Table 3: Liner regression about the social and psychological characteristics associated with suicide intent (n=791)

| Variables                    | $\beta$ | 95% CI       | p     |
|------------------------------|---------|--------------|-------|
| Education years              | -0.11   | -0.21, -0.01 | 0.037 |
| Religious belief             | 1.20    | 0.36, 2.04   | 0.005 |
| Living alone                 | 1.92    | 0.34, 3.51   | 0.017 |
| Negative life events         | 0.29    | 0.10, 0.48   | 0.003 |
| Impulsivity                  | -0.10   | -0.18, -0.02 | 0.013 |
| Mental disorder              | 2.82    | 1.98, 3.66   | 0.000 |
| Constant                     | 10.04   | 8.91, 11.16  | 0.000 |
| Adjust R <sup>2</sup> =0.097 |         |              |       |

Note: CI means confidence interval.

Stepwise liner regression was used in this regression.

# BMJ Open

## Features for Medically Serious Suicide Attempters Who Do Not Have a Strong Intent to Die: A Cross-sectional Study in Rural China

|                                 |                                                                                                                                                        |
|---------------------------------|--------------------------------------------------------------------------------------------------------------------------------------------------------|
| Journal:                        | <i>BMJ Open</i>                                                                                                                                        |
| Manuscript ID                   | bmjopen-2018-023991.R1                                                                                                                                 |
| Article Type:                   | Research                                                                                                                                               |
| Date Submitted by the Author:   | 15-Aug-2018                                                                                                                                            |
| Complete List of Authors:       | Sun, Long; Shandong University, School of public health<br>Zhang, Jie; Buffalo State, SUNY<br>Lamis, Dorian; Emory, Psychiatry and Behavioral Sciences |
| <b>Primary Subject Heading</b>: | Mental health                                                                                                                                          |
| Secondary Subject Heading:      | Emergency medicine, Mental health                                                                                                                      |
| Keywords:                       | Suicide intent, Medically serious suicide, Suicide attempters, Rural China                                                                             |
|                                 |                                                                                                                                                        |

SCHOLARONE™  
Manuscripts

Peer Review Only

1  
2  
3  
4 **1 Features for Medically Serious Suicide Attempters Who Do Not Have**  
5  
6 **2 a Strong Intent to Die: A Cross-sectional Study in Rural China<sup>1</sup>**  
7  
8

9  
10  
11  
12  
13 **5 Long Sun<sup>a</sup>, Jie Zhang<sup>a,b,\*</sup>, Dorian A. Lamis<sup>c</sup>**  
14  
15  
16  
17  
18

19 **7 a: Center for Suicide Prevention Research, School of Public Health, Shandong**  
20 **8 University, 44 Wenhuxi Road, Jinan, Shandong 250012, China. Email:**  
21 **9 sunlong@sdu.edu.cn**  
22  
23

24 **10 b: State University of New York Buffalo State, Buffalo, New York, USA;**  
25

26 **11 \*: Corresponding author. Department of Sociology, State University of New York**  
27 **12 Buffalo State, 1300 Elmwood Avenue, Buffalo, New York 14222, USA. Phone:**  
28 **13 716-878-6425; FAX: 716-878-4009; Email: zhangj@buffalostate.edu.**  
29  
30

31 **14 c: Department of Psychiatry and Behavioral Sciences, Emory University School of**  
32 **15 Medicine, 10 Park Place, Atlanta, Georgia, 30303, USA. Phone: 404-616-3533; Email:**  
33 **16 dorian.lamis@emory.edu**  
34  
35  
36  
37  
38  
39  
40  
41  
42  
43  
44  
45  
46  
47  
48  
49  
50  
51  
52

53  
54 <sup>1</sup> The research was supported by the United States National Institute of Mental Health  
55 (R01 MH068560) and National Natural Science Foundation of China (71603149).  
56

1  
2  
3  
4 18 **Features for Medically Serious Suicide Attempters Who Do Not Have**  
5  
6 19 **a Strong Intent to Die: A Cross-sectional Study in Rural China**  
7  
8  
9

10 **Abstract**

11  
12 21 **Objective**

13 22 Previous studies have implied that there were many Chinese suicide attempters who  
14 23 did not want to die by suicide. In the current study, we explored the factors which  
15 24 were associated with low levels of suicide intent. We also examined features for  
16 25 medically serious suicide attempters who do not have a strong intent to die in rural  
17 26 china.

18  
19  
20  
21 27 **Design**

22 28 Cross-sectional study

23  
24 29 **Setting**

25 30 The interviews occurred between May 2012 and July 2013 in thirteen rural counties in  
26 31 Shandong and Hunan Province, China.

27  
28  
29 32 **Participants**

30 33 Subjects were 791 medically serious suicide attempters whose injury and wounds  
31 34 were so serious they required hospitalization or immediate medical care.

32  
33 35 **Results**

34 36 The results supported that less years of education ( $\beta = -0.11, p = 0.037$ ), religious  
35 37 beliefs ( $\beta = 1.20, p = 0.005$ ), living alone ( $\beta = 1.92, p = 0.017$ ), negative life events  
36 38 ( $\beta = 0.29, p = 0.003$ ), low levels of impulsivity ( $\beta = -0.10, p = 0.013$ ), and mental  
37 39 disorders ( $\beta = 2.82, p < 0.001$ ) were associated with higher levels of suicide intent.

38  
39  
40 42 **Conclusion**

41 43 Results imply that there are some medically serious suicide attempters with a higher  
42 44 education and/or exhibit impulsivity who do not want to die by suicide. These  
43 45 findings can inform practice to prevent suicide in rural China.

46  
47  
48  
49 44 **Keywords:** Suicide intent; medically serious suicide; suicide attempters; rural China.  
50  
51  
52  
53  
54  
55

### Strengths and limitations of this study

1. This study is based on a large sample of suicide attempters in rural China ( $n=791$ );
2. Medically serious suicide attempters were consecutively recruited in selected emergency rooms, which ensured the validity of the sample.
3. This is one of few studies examining the factors associated with intent among medically serious suicide attempters in rural China.
4. As this is a cross-sectional study, we cannot infer causal relationships among study variables.
5. All of the attempters were interviewed following hospital discharge, so recall bias is a possibility.

1  
2  
3  
4 57 **Features for Medically Serious Suicide Attempters Who Do Not Have a Strong**  
5  
6 58 **Intent to Die: A Cross-sectional Study in Rural China**  
7  
8

9 59 **Background**  
10

11  
12 60 The World Health Organization (WHO) estimated that there were about 804, 000  
13  
14 61 suicide deaths worldwide in 2012, which equated to one person dying by suicide  
15  
16 62 every 40 seconds<sup>1</sup>. With regards to suicide attempts, some have suggested that the  
17  
18 63 number was about 20 times higher than suicide death<sup>2</sup>, and nearly 50% of attempts  
19  
20 64 required emergency medical treatment<sup>3,4</sup>. China has one of the higher suicide rates in  
21  
22 65 the world<sup>5</sup>. Although the rates have decreased in recent years, suicide attempts and  
23  
24 66 deaths are also important social and public health issues in China<sup>6</sup>.  
25  
26  
27

28 67 In the last decades, several studies have explored the patterns of suicide and  
29  
30 68 found differences between China and other countries<sup>7</sup>. Many of these investigations  
31  
32 69 imply that there are some suicide attempters who do not intend to die by suicide and  
33  
34 70 may only instrumentally use for some other aims, such as getting attention from their  
35  
36 71 family members, proving their viewpoint or behavior.  
37  
38  
39

40 72 First, there is a difference in percentages of mental disorders in suicide across  
41  
42 73 countries. In Western countries, it has been estimated that 90% of individuals who die  
43  
44 74 by suicide have a diagnosable mental disorder<sup>8</sup>. However, this percentage was lower  
45  
46 75 in comparison to Asian countries. For example, they were only about 40- 70% in  
47  
48 76 mainland China, 16.2% in Indian, and 12.0% in Malaysia<sup>9,10</sup>. Although mental  
49  
50 77 disorders remain an important risk factor for suicidal behavior, other factors may play  
51  
52 78 roles in Asian suicides. Thus, exploring the characteristics of suicide attempters in  
53  
54  
55

1  
2  
3  
4 79 China not only may help us to understand the differences between China and Western  
5  
6 80 countries, but also can provide important information about other Asian countries.  
7  
8

9 81 Secondly, impulsivity has been identified as another risk factor for suicide  
10  
11 82 attempts both in China and Western countries<sup>11 12</sup>. However, previous studies have  
12  
13 83 found that approximately 50% of suicide attempters in China could be categorized as  
14  
15 84 impulsive<sup>13</sup>. It further implies that there is a large group of Chinese suicide  
16  
17 85 attempters who do not really want to die by suicide, and their suicidal behaviors may  
18  
19 86 be impulsive.  
20  
21  
22

23 87 As mentioned above, many findings about Chinese suicide suggest that there are  
24  
25 88 some suicidal individuals who do not really want to die by suicide. Suicide intent is  
26  
27 89 defined as the level of intent to die by suicide<sup>14</sup>, and many studies show that it is  
28  
29 90 significantly associated with suicidal behavior<sup>15</sup>. Investigating suicide intent is  
30  
31 91 helpful for us to better understand the suicide attempters who do not really want to  
32  
33 92 die.  
34  
35  
36

37 93 In recent years, many studies identified factors associated with suicide intent. In  
38  
39 94 Western countries, researchers have found that older adults<sup>16</sup>, rural residence<sup>17</sup>,  
40  
41 95 mental health problems<sup>18</sup> and hopelessness<sup>19</sup> were associated with suicide intent. In  
42  
43 96 China, there were also some studies which supported that older age, higher level of  
44  
45 97 education, living alone and suicide communication were correlated with higher level  
46  
47 98 of suicide intent among individuals who died by suicide<sup>20 21</sup>. However, we have little  
48  
49 99 knowledge about the suicide intent among suicide attempters who do not really want  
50  
51 100 to die by suicide in China.  
52  
53  
54  
55  
56  
57  
58  
59  
60

1  
2  
3  
4 101 Thus, in the current study, we explored factors associated with low level of  
5  
6 102 suicide intent. It was helpful for us to understand the features for medically serious  
7  
8 103 suicide attempters who do not have a strong intent to die in rural China, which may  
9  
10 104 inform intervention and prevention strategies for at-risk individuals in rural China.  
11  
12

## 13 105 **Methods**

### 14 15 16 17 106 *Study sample and the design*

18  
19  
20 107 In the current study, all of attempters were chosen from two provinces in China,  
21  
22 108 Shandong and Hunan. Shandong is located in the north of China, and is a province  
23  
24 109 with economic prosperity in both industry and agriculture. Hunan is located in the  
25  
26 110 south of China, and is a province with economic prosperity in agriculture. In the two  
27  
28 111 provinces, thirteen rural counties were randomly selected.  
29  
30

31 112 In each of the rural county from May 2012 through July 2013, all hospital  
32  
33 113 emergency departments were instructed to notify the research teams in each province  
34  
35 114 when suicide attempts occurred. We consecutively recruited the attempters who were  
36  
37 115 aged 15-54 years in either rural region. The enrollment of patients followed the  
38  
39 116 definition of suicide attempt and deemed medically serious. In this study, suicide  
40  
41 117 attempt was defined as someone who attempted suicide and wanted to die, but did not  
42  
43 118 <sup>22 23</sup>, and medically serious suicide attempters included those survivors whose injury  
44  
45 119 and wounds were so serious as to require hospitalization or immediate medical care.  
46  
47  
48  
49

50 120 All of the interviewers received training about the study and were master or PhD  
51  
52 121 level students in the medical school. The main aims of this training were to provide  
53  
54 122 the interviewers with sufficient information about the study and questionnaire.  
55  
56

1  
2  
3  
4 123 ***Interviewing procedures***  
5  
6

7 124 All of the attempters were interviewed following hospital discharge. In order to  
8  
9 125 successfully contact the attempters, all of them were first approached in-person by the  
10  
11 126 local health agency and/or village administration. Upon their agreement of written  
12  
13 127 informed consent, the interview time was scheduled approximately two months after  
14  
15 128 suicide incident. Each attempter was interviewed separately by one trained  
16  
17 129 interviewer in private at the village medical room or their home. For those participants  
18  
19 130 who were too weak to talk, family members could assist in the interview by  
20  
21 131 answering some of the questions on the protocol. The average time for each interview  
22  
23 132 was 1.5 hours.  
24  
25

26  
27 133 ***Patient and Public Involvement Statement***  
28  
29

30  
31 134 The suicide attempters were first involved in the process of data collection. The  
32  
33 135 aims of this study and outcome measures were informed via the interviewers. Written  
34  
35 136 Informed consent was obtained from all participants of the study. There are no plans  
36  
37 137 to disseminate the qualitative study results to subjects or the relevant patient  
38  
39 138 community. The IRB approvals from both Chinese institutions (Shandong University  
40  
41 139 and Central North universities) and the US based university (State University of New  
42  
43 140 York, Buffalo State) where the principal investigator is affiliated ensured the ethical  
44  
45 141 methodology regulated by the NIMH.  
46  
47

48  
49 142 ***Measures***  
50  
51

52 143 ***Suicide Intent*** Beck's Suicidal Intent Scale (SIS) was used to measure the  
53  
54 144 degree of suicide intent for the attempters<sup>24</sup>. The SIS assesses attempters' precautions,  
55

1  
2  
3  
4 145 planning, communication, and expectations about the suicidal behavior. There are 15  
5  
6 146 items on this scale, and each item is scores from 0 to 2. The psychometric properties  
7  
8 147 of the English version of SIS has been evaluated among suicide attempts and  
9  
10 148 decedents<sup>25</sup>. The Chinese version of SIS also demonstrated sound reliability and  
11  
12 149 validity, which shown in a previous study<sup>26</sup>.

15  
16 150 ***Social-demographic variables*** **Age** which ranged from 15 to 54 years was  
17  
18 151 calculated to the time when the suicide occurred. **Gender** was measured by male or  
19  
20 152 female. **Education years** were evaluated by the number of years in which the  
21  
22 153 attempters completed in school. **Married status** was dichotomized as “never married”  
23  
24 154 and “ever married” with the latter including those who were divorced, separated, or  
25  
26 155 widowed. **Occupation** was assessed by peasant, businessman, public service staff,  
27  
28 156 student, factory worker, rural doctor, teacher, housewife, unemployed and others. As  
29  
30 157 most attempters were peasants, we recoded the variable into peasants and others.  
31  
32 158 **Religious belief** was measured by what religion the attempters believed in, and the  
33  
34 159 choices were Taoism, Muslim, Christianity, Buddhism, others, and no religion. As  
35  
36 160 there were few people who had a religious belief, the religious belief was recoded into  
37  
38 161 “yes” or “no.”

39  
40  
41  
42 162 ***Living alone*** Living alone was assessed by a question that “Do you live with  
43  
44 163 others?” with response options being “yes” or “no.” Participants who did not live with  
45  
46 164 others were deemed as living alone. The same evaluation method was used in our  
47  
48 165 previous suicide studies<sup>27</sup>.

1  
2  
3  
4 166        **Physical Disease**    Physical disease was assessed by one question: “Have you  
5  
6 167    been diagnosed with a chronic disease now?” with response options including “yes”  
7  
8 168    or “no.”

9  
10  
11 169        **Pesticide at home**    Pesticide availability at home was assessed with a single  
12  
13 170    item which asked the participants if any type of farming chemicals were stored at  
14  
15 171    home. The effect of pesticide on suicide has been shown in previous Chinese studies  
16  
17 172    <sup>28</sup>. The response options consisted of “yes” or “no.”

18  
19  
20  
21 173        **Family suicide history**    Family suicide history was measured by a question:  
22  
23 174    “Do your family members conduct suicide behavior before?” The answer also could  
24  
25 175    be chosen from “yes” or “no.”

26  
27  
28 176        **Negative life events**    Negative life events were determined by the revised  
29  
30 177    version of Interview for Recent Life Events (IRLE) <sup>29</sup>. The IRLE is a 64-item scale  
31  
32 178    which measured life events occurring in the past 12 months. We also asked another  
33  
34 179    question in case there were other life events which were not asked in the 64 items.  
35  
36 180    The attempters could also answer if each event was perceived as positive or negative.  
37  
38 181    In this study, we only used the number of negative life events (NLEs). The Chinese  
39  
40 182    version of IRLE has been used in previous suicide studies <sup>30</sup>.

41  
42  
43  
44 183        **Impulsivity**    The 23-item Dickman Impulsivity Inventory (DII) was used to  
45  
46 184    evaluate the level of impulsivity, which was developed and validated in English<sup>31</sup>.  
47  
48 185    Each item includes a response option of yes (1) or no (0). The sum score for all  
49  
50 186    items was used in the data analysis, and the higher score represents a higher level of

1  
2  
3  
4 187 impulsivity. The Chinese version of the DII has been tested and demonstrated sound  
5  
6 188 reliability and validity<sup>32</sup>.

7  
8  
9 189 **Coping skills** Coping Responses Inventory (CRI) was used to assess the  
10  
11 190 attempters' coping skills in this study<sup>33</sup>. It asked the participants to evaluate the  
12  
13 191 frequency (0= never, 1=occasionally, 2=sometimes, 3=often) of engaging in 48  
14  
15 192 separate coping activities. Sample questions on the CRI include "talk with your  
16  
17 193 spouse or other relative about the problem" and "think about how this event could  
18  
19 194 change your life in a positive way." The Chinese version of CRI had been used in  
20  
21 195 previous suicide studies<sup>34</sup>.

22  
23  
24  
25 196 **Mental disorder** We used the Chinese version of the Structured Clinical  
26  
27 197 Interview for the Diagnostic and Statistical Manual of Mental Disorders (SCID)<sup>35</sup> to  
28  
29 198 determine diagnoses for suicide attempters. Diagnoses were made by the psychiatrists  
30  
31 199 with the written information obtained by the trained interviewers for each suicide  
32  
33 200 attempt. There was one psychiatrist to make the diagnosis in each province. The  
34  
35 201 Chinese version of the SCID was provided by the Department of Psychiatry of  
36  
37 202 Kaohsiung Medical College in Taiwan<sup>36</sup>, and permission to use the work had been  
38  
39 203 obtained. It also had been used in Chinese populations in many areas including  
40  
41 204 Taiwan, Hong Kong, Macau, as well as mainland China for the past few decades<sup>37</sup>. A  
42  
43 205 total of 27 Axis I mental diseases were detected by the SCID, and we used the  
44  
45 206 dichotomous diagnosis for each of them with yes and no.

46  
47  
48  
49  
50 207 **Statistical Methods**

1  
2  
3  
4 208 IBM SPSS Statistics 24.0 (Web Edition) was used for the data analysis. T-tests  
5  
6 209 or bi-variable correlation analysis were used to compare the differences in suicide  
7  
8 210 intent among categorical and continuous variables. Stepwise liner regression was  
9  
10 211 conducted to examine the factors related to suicide intent. All of the tests were  
11  
12 212 two-tailed and a p value of <0.05 was considered statistically significant.  
13  
14

## 15 213 **Results**

16  
17  
18 214 In the current study, 791 suicide attempters were successfully interviewed. Table  
19  
20 215 1 describes the sample distribution regarding social and psychological characteristics.  
21  
22 216 The average age and education years were 31.63 and 6.90, respectively. Among these  
23  
24 217 attempters, there were more females (63.0%) and peasants (53.4%). The majority of  
25  
26 218 attempters were ever married (83.3%), did not believe in religion (81.3%), did not  
27  
28 219 suffer from a physical disease (83.2%), stored pesticides at home (60.4%), did not live  
29  
30 220 alone (95.6%), nor had a family history or suicide (92.9%) or were diagnosed with a  
31  
32 221 mental disorder (80.9%). The mean for negative life events, impulsivity and coping  
33  
34 222 skills were 1.83, 9.89 and 33.13, respectively.  
35  
36  
37  
38

39 223 We also examined the differences in suicide intent among these social and  
40  
41 224 psychological characteristics. Results demonstrated that age ( $r = 0.071, p = 0.045$ ),  
42  
43 225 education years ( $r = -0.076, p = 0.032$ ), religious belief ( $t = 3.340, p = 0.001$ ), living  
44  
45 226 alone ( $t = 2.315, p = 0.021$ ), physical disease ( $t = 2.416, p = 0.016$ ), negative life  
46  
47 227 events ( $r = 0.148, p = 0.001$ ), impulsivity ( $r = -0.084, p = 0.019$ ), and mental disorder  
48  
49 228 ( $t = 7.393, p = 0.001$ ) were associated with suicide intent (see Table 2).  
50  
51  
52  
53  
54  
55

1  
2  
3  
4 229 Results of stepwise liner regression examining factors associated with suicide  
5  
6 230 intent are presented in Table 3. We found that less education years ( $\beta = -0.11, p =$   
7  
8 231  $0.037$ ), religious belief ( $\beta = 1.20, p = 0.005$ ), living alone ( $\beta = 1.92, p = 0.017$ ),  
9  
10 232 negative life events ( $\beta = 0.29, p = 0.003$ ), low level of impulsivity ( $\beta = -0.10, p =$   
11  
12 233  $0.013$ ), mental disorder ( $\beta = 2.82, p = 0.001$ ) were associated with higher levels of  
13  
14 234 suicide intent.

### 235 Discussion

236 The present study focused on suicide intent among medically serious suicide  
237 attempters in rural China. The primary purpose was to explore the features for  
238 medically serious suicide attempters who did not have a strong intent to die. Results  
239 indicated that the attempters with a strong intent to die were associated with religious  
240 belief, living alone, negative life events and mental disorder; whereas, the low intent  
241 suicide attempters has less years of education and more impulsivity.

242 We found that education years were negatively associated with suicide intent. It  
243 means that the attempters with higher education have lower intention to die by suicide  
244 behavior. Many studies have identified that higher education was a protective factor  
245 for suicide behavior worldwide<sup>38 39</sup>. In China, previous studies also support this  
246 relationship between education and suicide intent among rural suicides<sup>40</sup>.

247 Religious belief is another factor associated with strong suicide intent. As there  
248 are few people who have a religious belief in China<sup>41</sup>, many people see religious  
249 belief as a deviant behavior. Suicide which also can be seen as a deviant behavior in  
250 the society may be correlated between them. Besides, many Chinese rural residents

1  
2  
3  
4 251 believe in a religion after they suffer difficulties or misfortunes. Suffering difficulties  
5  
6 252 or misfortunes, as an important risk factor for suicide <sup>42</sup>, may promote the intent to die  
7  
8 253 by suicide in rural China. This is why attempters with religious belief have strong  
9  
10 254 intent to die by suicide. It is different from the findings in Western countries <sup>43</sup>.

11  
12  
13 255 We also found living alone and negative life events were associated with suicide  
14  
15 256 intent among attempters. Both of them have been shown to be risk factors for suicide  
16  
17 257 behavior in previous studies worldwide <sup>44,45</sup>. People living alone often find it difficult  
18  
19 258 to communicate with others, which is a risk factor for suicide intent <sup>46</sup>. Individuals  
20  
21 259 who encounter negative life events often experience psychological problems, which  
22  
23 260 are contribute to suicidal behavior. In the same way, people who live alone and suffer  
24  
25 261 negative life events may have a strong intent to die by suicide.

26  
27  
28  
29 262 Impulsivity has been identified as an important risk factor for suicide in many  
30  
31 263 studies <sup>47,48</sup>. As we discussed above, many Chinese suicide attempters can be  
32  
33 264 categorized as impulsive <sup>13</sup>. One of the possible reasons may be that borderline  
34  
35 265 personality disorder is associated with impulsivity and self-harm behavior, but was  
36  
37 266 not diagnosed in the current study <sup>49</sup>. Previous studies have also suggested that  
38  
39 267 impulsivity contributed to suicide death in rural China <sup>21</sup>. It implies that some  
40  
41 268 attempters do not want to die by suicide, which is consistent with our assumption.

42  
43  
44  
45 269 The present study also identified mental disorders as an important risk factor for  
46  
47 270 suicidal behavior <sup>50-52</sup>. An individual diagnosed with a mental disorder suffers from  
48  
49 271 psychological symptoms, which contribute to an increased risk for suicide. Thus,  
50  
51 272 attempters with mental disorders may want to die more than those without.

1  
2  
3  
4 273 In the current study, we did not find gender differences in suicide intent among  
5  
6 274 suicide attempters. Previous studies demonstrated that male attempters tend to choose  
7  
8 275 violent and lethal methods<sup>53</sup>, it was easy for us to conclude that males may  
9  
10 276 experience higher levels of suicide intent. However, the choice of the suicide means  
11  
12 277 may be caused by the higher level of violence for men compared to women, and we  
13  
14 278 cannot conclude that men may have a higher intent to die<sup>21</sup>. In the current study, we  
15  
16 279 also examined the relationship between physical disease, family suicide history, and  
17  
18 280 suicide intent. Both of them were not associated with suicide intent. Physical disease  
19  
20 281 was associated with suicidal behavior, which was supported by previous studies<sup>54</sup>.  
21  
22  
23 282 However, physical disease did not have a stronger association with those identified  
24  
25 283 with a stronger intent to die compared to those who did not have a strong intent to die.  
26  
27 284 Previous studies have found that physical disease may lead to a mental disorder,  
28  
29 285 increasing the likelihood for suicidal behavior<sup>55</sup>. Although some studies found family  
30  
31 286 suicide history was associated with suicidal behavior<sup>56</sup>, we did not find any evidence  
32  
33 287 showing this relation.

34  
35  
36  
37 288 There were several limitations to our study, which should be considered when  
38  
39 289 interpreting these findings. First, as this is a cross-sectional study, we cannot infer any  
40  
41 290 causal relationship for the study variables. Secondly, all of the attempters were  
42  
43 291 interviewed following discharge from hospitals, so recall bias is a potential  
44  
45 292 confounder. Third, the participants in this study were all medically serious suicide  
46  
47 293 attempters, and the results may be not be consistent with other types of suicide  
48  
49 294 attempt. Finally, lethality, which is an important factor associated with suicide intent,  
50  
51 295 was not investigated in our study.  
52  
53  
54  
55

1  
2  
3  
4 296 **Conclusion**

5  
6  
7 297 Despite these limitations, this study contributes to our understanding of Chinese  
8  
9 298 suicidal behavior. Our results support that there are some medically serious suicide  
10  
11 299 attempters with higher education and impulsivity who do not really want to die by  
12  
13 300 suicide. These findings can inform suicide assessment and intervention to prevent  
14  
15 301 suicide in China<sup>57</sup>.

16  
17  
18  
19 302 ***Contributorship statement***

20  
21  
22 303 LS analyzed the data and wrote the manuscript, JZ designed the study and  
23  
24 304 reviewed the paper, and DL reviewed and edited the manuscript.

25  
26  
27 305 ***Competing interests***

28  
29  
30 306 All authors declare that they have no competing interests.

31  
32  
33 307 ***Funding***

34  
35  
36  
37 308 The research was supported by the United States National Institute of Mental  
38  
39 309 Health (R01 MH068560) and National Natural Science Foundation of China  
40  
41 310 (71603149).

42  
43  
44  
45 311 ***Data sharing statement***

46  
47  
48 312 The data and materials used in this study are available from the first author (LS)  
49  
50 313 and corresponding author (JZ) on reasonable request.

51  
52  
53 314 ***Acknowledgements***

1  
2  
3  
4 315 We would like to thank the participants in this study, and we also want to thank  
5  
6 316 the research teams in China for their field work in the data collection.  
7  
8

9 317

10  
11  
12 318  
13  
14  
15  
16  
17  
18  
19  
20  
21  
22  
23  
24  
25  
26  
27  
28  
29  
30  
31  
32  
33  
34  
35  
36  
37  
38  
39  
40  
41  
42  
43  
44  
45  
46  
47  
48  
49  
50  
51  
52  
53  
54  
55  
56  
57  
58  
59  
60

For peer review only

**References:**

- 1  
2  
3  
4 319
- 5 320 1. WHO. Preventing Suicide: A Global Imperative. World Health Organization, Geneva 2014.
  - 6 321 2. Sun J, Guo X, Zhang J, et al. Incidence and fatality of serious suicide attempts in a  
7 322 predominantly rural population in Shandong, China: a public health surveillance  
8 323 study. *BMJ Open* 2015;5(2):e006762. doi: 10.1136/bmjopen-2014-006762
  - 9 324 3. Maris RW, Berman AL, Silverman MM. Comprehensive Textbook of Suicidology. New York:  
10 325 The Guilford Press 2000.
  - 11 326 4. Crosby AE, Han B, Ortega LAG, et al. Suicide thoughts and behaviors among adults aged  
12 327  $\geq$  18 years -- United States, 2008-2009. *Morbidity and Mortality Weekly Report*  
13 328 *Surveillance Summaries* 2011;60(13):1-22. [published Online First: October 21, 2011]
  - 14 329 5. Phillips MR, Li X, Zhang Y. Suicide rates in China, 1995-99. *The Lancet*  
15 330 2002;359(9359):835-40. doi: 10.1016/S0140-6736(02)07954-0
  - 16 331 6. Zhang J, Sun L, Liu Y, et al. The change in suicide rates between 2002 and 2011 in China.  
17 332 *Suicide Life Threat Behav* 2014;44(5):560-68. doi: 10.1111/sltb.12090 [published  
18 333 Online First: 2014/04/03]
  - 19 334 7. Qin P, Mortensen PB. Specific characteristics of suicide in China. *Acta Psychiatr Scand*  
20 335 2001;103(2):117-21.
  - 21 336 8. Cavanagh JT, Carson AJ, Sharpe M, et al. Psychological autopsy studies of suicide: a  
22 337 systematic review. *Psychol Med* 2003;33(3):395-405.
  - 23 338 9. Zhang J, Xiao S, Zhou L. Mental disorders and suicide among young rural Chinese: a  
24 339 case-control psychological autopsy study. *Am J Psychiatry* 2010;167(7):773-81. doi:  
25 340 10.1176/appi.ajp.2010.09101476 [published Online First: 2010/04/17]
  - 26 341 10. Choo CC, Harris KM, Chew PKH, et al. Does ethnicity matter in risk and protective factors  
27 342 for suicide attempts and suicide lethality? *PloS one* 2017;12(4):e0175752. doi:  
28 343 10.1371/journal.pone.0175752
  - 29 344 11. Zhang J, Lin L. The Moderating Effects of Impulsivity on Chinese Rural Young Suicide. *J*  
30 345 *Clin Psychol* 2014;70(6):579-88. doi: 10.1002/jclp.22039
  - 31 346 12. Baca-Garcia E, Diaz-Sastre C, Garcia Resa E, et al. Suicide attempts and impulsivity. *Eur*  
32 347 *Arch Psychiatry Clin Neurosci* 2005;255(2):152-56. doi: 10.1007/s00406-004-0549-3
  - 33 348 13. Li X, Phillips M, Wang Y, et al. The comparison of impulsive and non-impulsive attempted  
34 349 suicide. *Chinese Journal of Nervous and Mental Diseases* 2003;29(1):27-31.
  - 35 350 14. Freedenthal S. Assessing the wish to die: a 30-year review of the suicide intent scale.  
36 351 *Arch Suicide Res* 2008;12(4):277-98. doi: 10.1080/13811110802324698
  - 37 352 15. Scocco P, Marietta P, Tonietto M, et al. The role of psychopathology and suicidal  
38 353 intention in predicting suicide risk: a longitudinal study. *Psychopathology*  
39 354 2000;33(3):143-50. doi: 29136 [published Online First: 2000/04/25]
  - 40 355 16. Miret M, Nuevo R, Morant C, et al. Differences between younger and older adults in the  
41 356 structure of suicidal intent and its correlates. *Am J Geriatr Psychiatry*  
42 357 2010;18(9):839-47. doi: 10.1097/JGP.0b013e3181d145b0
  - 43 358 17. Krishna M, Rajendra R, Majgi SM, et al. Severity of suicidal intent, method and behaviour  
44 359 antecedent to an act of self-harm: a cross sectional study of survivors of self-harm

- referred to a tertiary hospital in Mysore, south India. *Asian J Psychiatr* 2014;12:134-9. doi: 10.1016/j.ajp.2014.09.002
- 361
- 362 18. Mars B, Heron J, Crane C, et al. Differences in risk factors for self-harm with and without  
363 suicidal intent: findings from the ALSPAC cohort. *J Affect Disord* 2014;168:407-14.  
364 doi: 10.1016/j.jad.2014.07.009
- 365 19. Cheung YB, Law CK, Chan B, et al. Suicidal ideation and suicidal attempts in a  
366 population-based study of Chinese people: risk attributable to hopelessness,  
367 depression, and social factors. *J Affect Disord* 2006;90(2-3):193-99. doi:  
368 10.1016/j.jad.2005.11.018 [published Online First: 2006/01/13]
- 369 20. Zhou X, Jia S. Suicidal communication signifies suicidal intent in Chinese completed  
370 suicides. *Soc Psychiatry Psychiatr Epidemiol* 2012;47(11):1845-54. doi:  
371 10.1007/s00127-012-0488-7
- 372 21. Sun L, Zhang J. Characteristics of Chinese rural young suicides: Who did not have a strong  
373 intent to die. *Compr Psychiatry* 2015;57(1):73-78. doi:  
374 10.1016/j.comppsy.2014.11.019
- 375 22. Silverman MM, Berman AL, Sanddal ND, et al. Rebuilding the tower of Babel: a revised  
376 nomenclature for the study of suicide and suicidal behaviors. Part 1: Background,  
377 rationale, and methodology. *Suicide Life Threat Behav* 2007;37(3):248-63. doi:  
378 10.1521/suli.2007.37.3.248
- 379 23. Silverman MM, Berman AL, Sanddal ND, et al. Rebuilding the tower of Babel: a revised  
380 nomenclature for the study of suicide and suicidal behaviors. Part 2: Suicide-related  
381 ideations, communications, and behaviors. *Suicide Life Threat Behav*  
382 2007;37(3):264-77. doi: 10.1521/suli.2007.37.3.264
- 383 24. Beck AT, Schuyler D, Herman I. Development of Suicidal Intent Scales. Oxford, England:  
384 Charles Press Publishers 1974:249.
- 385 25. Beck AT, Lester D. Components of suicidal intent in completed and attempted suicides. *J*  
386 *Psychol* 1976;92(1):35-38.
- 387 26. Zhang J, Jia CX. Suicidal intent among young suicides in rural China. *Arch Suicide Res*  
388 2011;15(2):127-39. doi: 10.1080/13811118.2011.565269
- 389 27. Zhang J, Sun L. Suicide ideation and acceptability among females aged 15 to 34 years in  
390 rural China. *J Nerv Ment Dis* 2014;202(2):161-66.
- 391 28. Zhang M, Fang X, Zhou L, et al. Pesticide poisoning in Zhejiang, China: a retrospective  
392 analysis of adult cases registration by occupational disease surveillance and  
393 reporting systems from 2006 to 2010. *BMJ Open* 2013;3(11):e003510. doi:  
394 10.1136/bmjopen-2013-003510
- 395 29. Paykel ES, Prusoff BA, Uhlenhuth EH. Scaling of life events. *Archives of general psychiatry*  
396 1971;25(4):340-47. doi: 10.1001/archpsyc.1971.01750160052010 [published Online  
397 First: 1971/10/01]
- 398 30. Sun L, Zhang J. Coping Skill as a Moderator Between Negative Life Events and Suicide  
399 Among Young People in Rural China. *J Clin Psychol* 2015;71(3):258-66. doi:  
400 10.1002/jclp.22140
- 401 31. Dickman SJ. Functional and dysfunctional impulsivity: personality and cognitive  
402 correlates. *J Pers Soc Psychol* 1990;58(1):95-102. doi: 10.1037/0022-3514.58.1.95

- 1  
2  
3 403 32. Gao Q, Zhang J, Jia C. Psychometric properties of the Dickman Impulsivity Instrument in  
4 404 suicide victims and living controls of rural China. *J Affect Disord*  
5 405 2011;132(2011):368-74. doi: 10.1016/j.jad.2011.03.002  
6  
7 406 33. Moos RH, Brennan PL, Fondacaro MR, et al. Approach and avoidance coping responses  
8 407 among older problem and nonproblem drinkers. *Psychol Aging* 1990;5(1):31-40.  
9 408 [published Online First: 1990/03/01]  
10  
11 409 34. Sun L, Zhang J. Psychological Strains and Suicidal Intent An Empirical Study to Relate the  
12 410 2 Psychopathological Variables. *J Nerv Ment Dis* 2016;204(11):855-60. doi:  
13 411 10.1097/Nmd.0000000000000529  
14  
15 412 35. Spitzer RL, Williams JBW, Gibbon M, et al. Instruction Manual for the Structured Clinical  
16 413 Interview for DSM-III-R (SCID, 6/1/88 Revision). New York: Biometrics Research  
17 414 Department, New York State Psychiatric Institute 1988.  
18  
19 415 36. Gu J, Chen Y. Instruction Manual for the Structured Clinical Interview for DSM-III-R  
20 416 (Chinese Edition). Kaohsiung: Kaohsiung Medical College, Taiwan 1993.  
21  
22 417 37. Lyu J, Zhang J. Characteristics of schizophrenia suicides compared with suicides by other  
23 418 diagnosed psychiatric disorders and those without a psychiatric disorder. *Schizophr*  
24 419 *Res* 2014;155(2014):59-65. doi: 10.1016/j.schres.2014.02.018 [published Online First:  
25 420 2014/03/25]  
26  
27 421 38. Li Y, Li Y, Cao J. Factors associated with suicidal behaviors in mainland China: a  
28 422 meta-analysis. *BMC public health* 2012;12(1):524-30. doi:  
29 423 10.1186/1471-2458-12-524  
30  
31 424 39. Beautrais AL. Risk factors for suicide and attempted suicide among young people. *Aust N*  
32 425 *Z J Psychiatry* 2000;34(3):420-36. doi: 0.1080/j.1440-1614.2000.00691.x  
33  
34 426 40. Liu B, Wang X, Jia C. Suicide attempters with high and low suicide intent: Different  
35 427 populations in rural China. *Psychiatry Res* 2017;251:176-81. doi:  
36 428 10.1016/j.psychres.2017.01.096  
37  
38 429 41. Yang FG. The red, black, and gray markets of religion in China. *Sociol Quart*  
39 430 2006;47(1):93-122. doi: DOI 10.1111/j.1533-8525.2006.00039.x  
40  
41 431 42. Jaiswal SV, Faye AD, Gore SP, et al. Stressful life events, hopelessness, and suicidal intent  
42 432 in patients admitted with attempted suicide in a tertiary care general hospital. *J*  
43 433 *Postgrad Med* 2016;62(2):102-4. doi: 10.4103/0022-3859.180556  
44  
45 434 43. Stack S, Kposowa AJ. Religion and suicide acceptability: a cross-national analysis. *J Sci*  
46 435 *Study Relig* 2011;50(2):289-306.  
47  
48 436 44. Bao WN, Haas A, Pi Y. Life strain, negative emotions, and delinquency: An empirical test  
49 437 of general strain theory in the People's Republic of China. *Int J Offender Ther Comp*  
50 438 *Criminol* 2004;48(3):281-97.  
51  
52 439 45. Kinyanda E, Hjelmeland H, Musisi S. Negative life events associated with deliberate  
53 440 self-harm in an African population in Uganda. *Crisis* 2005;26(1):4-11. doi:  
54 441 10.1027/0227-5910.26.1.4 [published Online First: 2005/03/15]  
55  
56 442 46. Pompili M, Belvederi Murri M, Patti S, et al. The communication of suicidal intentions: a  
57 443 meta-analysis. *Psychol Med* 2016;46(11):2239-53. doi: 10.1017/S0033291716000696  
58  
59  
60

- 1  
2  
3  
4 444 47. Braquehais MD, Oquendo MA, Baca-Garcia E, et al. Is impulsivity a link between  
5 445 childhood abuse and suicide? *Compr Psychiatry* 2010;51(2):121-29. doi:  
6 446 10.1016/j.comppsy.2009.05.003  
7 447 48. Swann AC, Dougherty DM, Pazzaglia PJ, et al. Increased Impulsivity Associated With  
8 448 Severity of Suicide Attempt History in Patients With Bipolar Disorder. *Am J*  
9 449 *Psychiatry* 2005;162(9):1680-87. doi: 10.1176/appi.ajp.162.9.1680  
10 450 49. Choo C, Diederich J, Song I, et al. Cluster analysis reveals risk factors for repeated suicide  
11 451 attempts in a multi-ethnic Asian population. *Asian J Psychiatr* 2014;8:38-42. doi:  
12 452 10.1016/j.ajp.2013.10.001  
13 453 50. Bi B, Tong J, Liu L, et al. Comparison of patients with and without mental disorders  
14 454 treated for suicide attempts in the emergency departments of four general hospitals  
15 455 in Shenyang, China. *Gen Hosp Psychiatry* 2010;32(5):549-55. doi:  
16 456 10.1016/j.genhosppsy.2010.06.003  
17 457 51. Beautrais AL, Deavoll BJ, Fergusson DM, et al. Prevalence and comorbidity of mental  
18 458 disorders in persons making serious suicide attempts: a case-control study. *Am J*  
19 459 *Psychiatry* 1996;153(8):1009-14.  
20 460 52. Xu H, Qin L, Wang J, et al. A cross-sectional study on risk factors and their interactions  
21 461 with suicidal ideation among the elderly in rural communities of Hunan, China. *BMJ*  
22 462 *Open* 2016;6(4):e010914. doi: 10.1136/bmjopen-2015-010914  
23 463 53. Choo CC, Harris KM, Ho RC. Prediction of Lethality in Suicide Attempts: Gender Matters.  
24 464 *Omega (Westport)* 2017;30222817725182. doi: 10.1177/0030222817725182  
25 465 54. Timonen M, Viilo K, Vaisanen E, et al. Burden of illness and suicide in elderly people.  
26 466 Physical disease and depression are prevalent in elderly Finnish suicide victims. *Bmj*  
27 467 2002;325(7361):441.  
28 468 55. Ge D, Sun L, Zhou C, et al. Exploring the risk factors of suicidal ideation among the  
29 469 seniors in Shandong, China: A path analysis. *J Affect Disord* 2017;207:393-97. doi:  
30 470 10.1016/j.jad.2016.09.031  
31 471 56. Bridge JA, Reynolds B, McBee-Strayer SM, et al. Impulsive aggression, delay discounting,  
32 472 and adolescent suicide attempts: effects of current psychotropic medication use and  
33 473 family history of suicidal behavior. *J Child Adolesc Psychopharmacol*  
34 474 2015;25(2):114-23. doi: 10.1089/cap.2014.0042  
35 475 57. Harris KM, Syu JJ, Lello OD, et al. The ABC's of Suicide Risk Assessment: Applying a  
36 476 Tripartite Approach to Individual Evaluations. *PloS one* 2015;10(6):e0127442. doi:  
37 477 10.1371/journal.pone.0127442

45  
46 478  
47 479

480 Table 1: Description of the social and psychological characteristics among Chinese  
 481 rural medically serious suicide attempters ( $n = 791$ )

| Variables              |               | Mean±SD/n (%) |
|------------------------|---------------|---------------|
| Age                    | -             | 31.63±8.00    |
| Gender                 | Male          | 293 (37.0)    |
|                        | Female        | 498 (63.0)    |
| Education years        | -             | 6.90±3.26     |
| Married status         | Never married | 132 (16.7)    |
|                        | Ever Married  | 659 (83.3)    |
| Occupation             | Peasant       | 422 (53.4)    |
|                        | Others        | 369 (46.6)    |
| Religious belief       | Yes           | 148 (18.7)    |
|                        | No            | 643 (81.3)    |
| Living alone           | Yes           | 35 (4.4)      |
|                        | No            | 756 (95.6)    |
| Physical disease       | Yes           | 133 (16.8)    |
|                        | No            | 658 (83.2)    |
| Pesticide at home      | Yes           | 478 (60.4)    |
|                        | No            | 313 (39.6)    |
| Family suicide history | Yes           | 56 (7.1)      |
|                        | No            | 735 (92.9)    |
| Negative life events   | -             | 1.83±1.77     |
| Impulsivity            | -             | 9.89±4.08     |
| Coping skill           | -             | 33.13±10.16   |
| Mental disorder        | Yes           | 151 (19.1)    |
|                        | No            | 640 (80.9)    |

482

483

484 Table 2: Comparing the suicide intent among the social and psychological  
 485 characteristics ( $n = 791$ )

| Variables              | Suicide intent (Mean±SD) | <i>t/r</i> | <i>p</i> |
|------------------------|--------------------------|------------|----------|
| Age                    | -                        | 0.071      | 0.045    |
| Gender                 |                          | 0.342      | 0.559    |
| Male                   | 9.37±4.96                |            |          |
| Female                 | 9.86±4.84                |            |          |
| Education years        | -                        | -0.076     | 0.032    |
| Married status         |                          | 1.179      | 0.239    |
| Never married          | 9.22±4.88                |            |          |
| Ever married           | 9.77±4.89                |            |          |
| Occupation             |                          | 1.811      | 0.071    |
| Peasant                | 9.97±4.92                |            |          |
| Others                 | 9.34±4.84                |            |          |
| Religious belief       |                          | 3.430      | 0.001    |
| Yes                    | 10.91±4.82               |            |          |
| No                     | 9.39±4.87                |            |          |
| Living alone           |                          | 2.315      | 0.021    |
| Yes                    | 11.54±5.52               |            |          |
| No                     | 9.59±4.85                |            |          |
| Physical disease       |                          | 2.416      | 0.016    |
| Yes                    | 10.61±4.93               |            |          |
| No                     | 9.49±4.86                |            |          |
| Pesticide at home      |                          | -0.980     | 0.327    |
| Yes                    | 9.54±4.66                |            |          |
| No                     | 9.89±5.23                |            |          |
| Family suicide history |                          | 2.104      | 0.036    |
| Yes                    | 11.00±5.18               |            |          |
| No                     | 9.58±4.86                |            |          |
| Negative life events   | -                        | 0.148      | 0.000    |
| Impulsivity            | -                        | -0.084     | 0.019    |
| Coping skill           | -                        | -0.067     | 0.061    |
| Mental disorder        |                          | 7.393      | 0.000    |
| Yes                    | 12.24±4.77               |            |          |
| No                     | 9.07±4.72                |            |          |
| All                    | 9.68±4.89                | -          | -        |

486

487

488 Table 3: Liner regression about the social and psychological characteristics associated  
 489 with suicide intent (n = 791)

| Variables                    | $\beta$ | 95% CI       | p     |
|------------------------------|---------|--------------|-------|
| Education years              | -0.11   | -0.21, -0.01 | 0.037 |
| Religious belief             | 1.20    | 0.36, 2.04   | 0.005 |
| Living alone                 | 1.92    | 0.34, 3.51   | 0.017 |
| Negative life events         | 0.29    | 0.10, 0.48   | 0.003 |
| Impulsivity                  | -0.10   | -0.18, -0.02 | 0.013 |
| Mental disorder              | 2.82    | 1.98, 3.66   | 0.000 |
| Constant                     | 10.04   | 8.91, 11.16  | 0.000 |
| Adjust R <sup>2</sup> =0.097 |         |              |       |

490 Note: CI means confidence interval.

491 Stepwise liner regression was used in this regression.

492
